# Supplementary material
Source: PubMed Central journal article supplement (PMC8176766)
Supplement: bloodBLD2021010684-suppl1.pdf [file bloodBLD2021010684-suppl1.pdf]

**Supplementary Information****Cryo-EM structures of human coagulation factors V and Va****Eliza A. Ruben<sup>1</sup>, Michael J. Rau<sup>2</sup>, James A. J. Fitzpatrick<sup>2,3,4,5</sup> and Enrico Di Cera<sup>1</sup>**<sup>1</sup>Edward A. Doisy Department of Biochemistry and Molecular Biology, Saint Louis University School of Medicine, St. Louis, MO 63104 USA<sup>2</sup>Washington University Center for Cellular Imaging, Washington University School of Medicine, Saint Louis, MO 63110 USA<sup>3</sup>Department of Cell Biology and Physiology, Washington University School of Medicine, Saint Louis, MO 63110 USA<sup>4</sup>Department of Neuroscience, Washington University School of Medicine, Saint Louis, MO 63110 USA<sup>5</sup>Department of Biomedical Engineering, Washington University in Saint Louis, Saint Louis, MO 63130 USA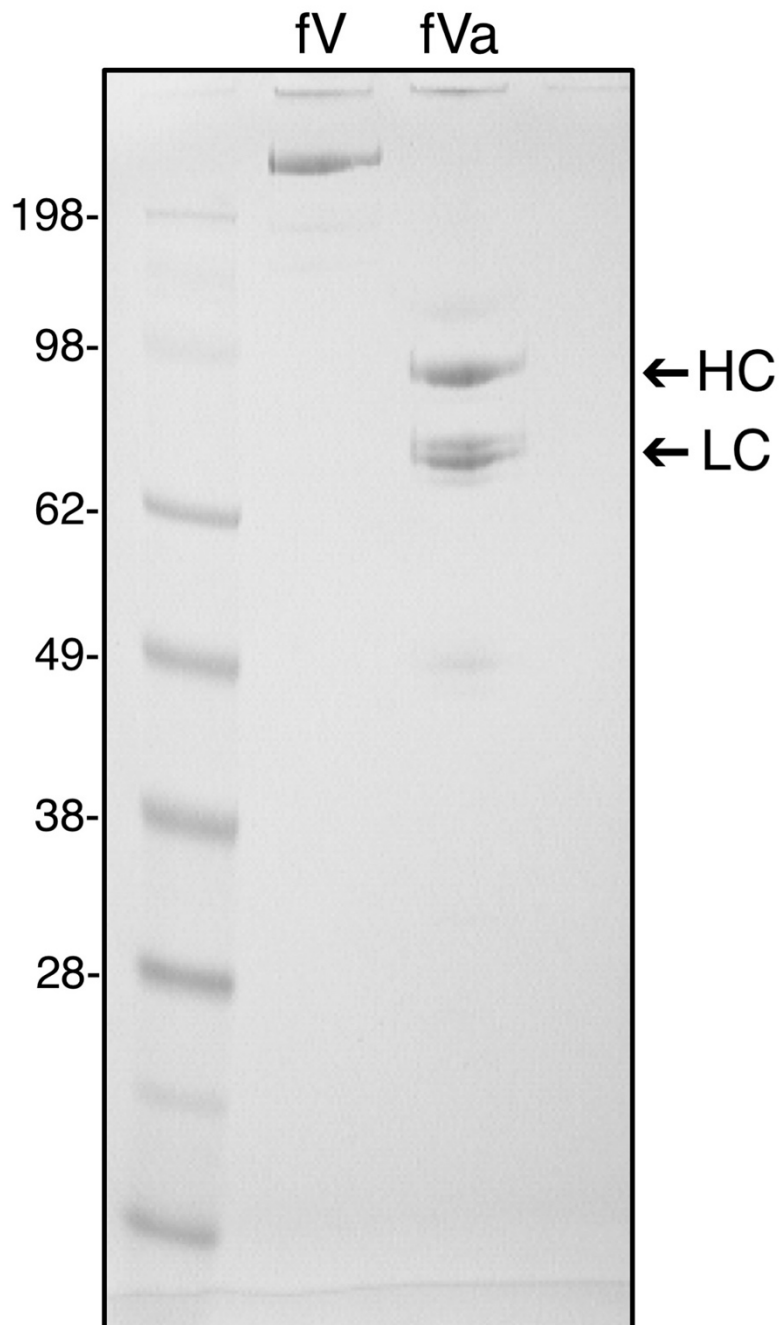

**Supplementary Figure 1.** Final samples of fV and fVa used for vitrification. HC: heavy chain; LC: light chain.

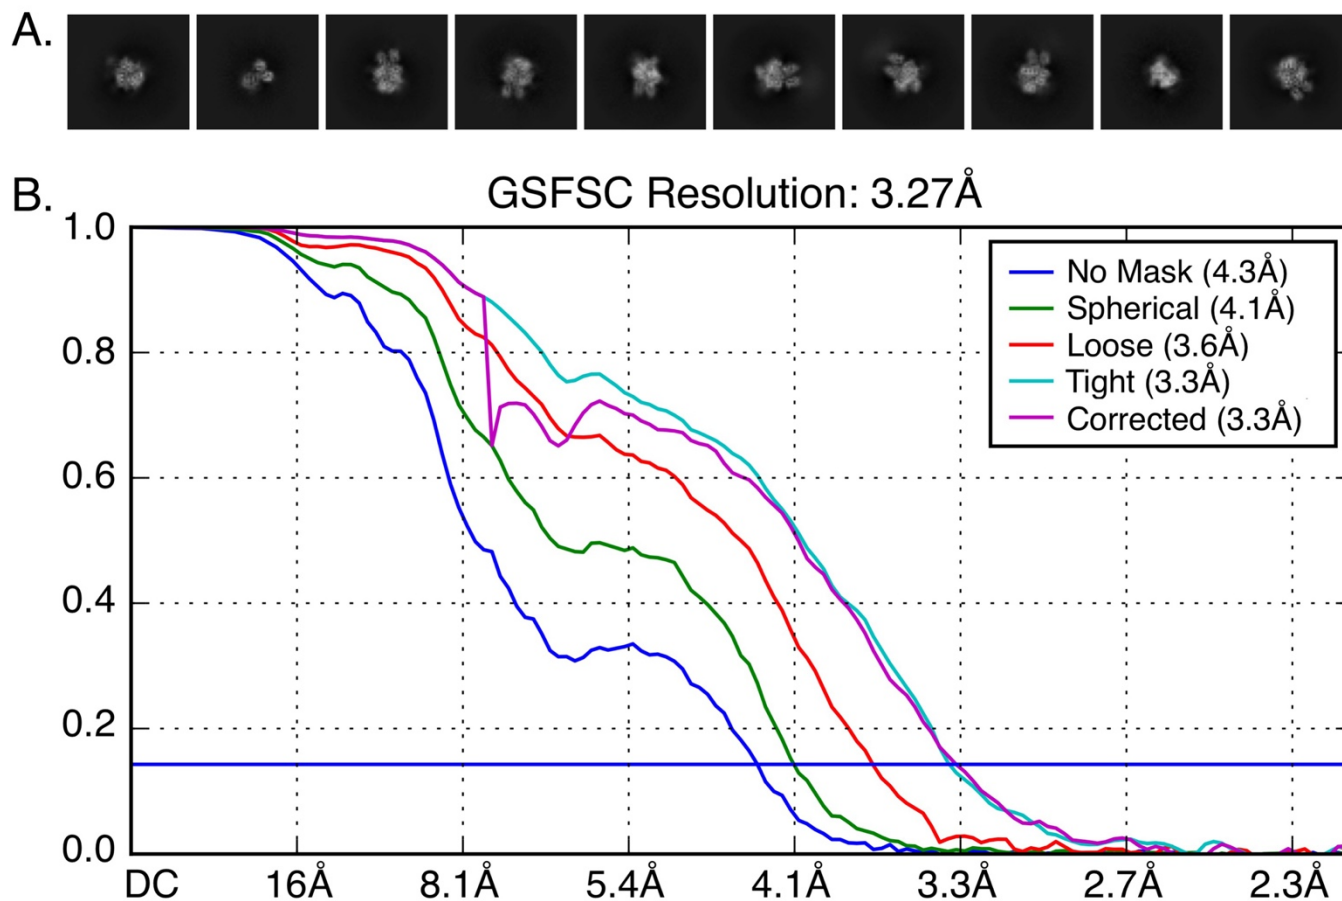

**Supplementary Figure 2A-B.** Data quality of the cryo-EM structure of fV shown as (A) representative 2D class averages and (B) gold standard Fourier shell correlation (GSFSC) of masked refinement of the fV map at 3.27 Å resolution (emd id: 23048).

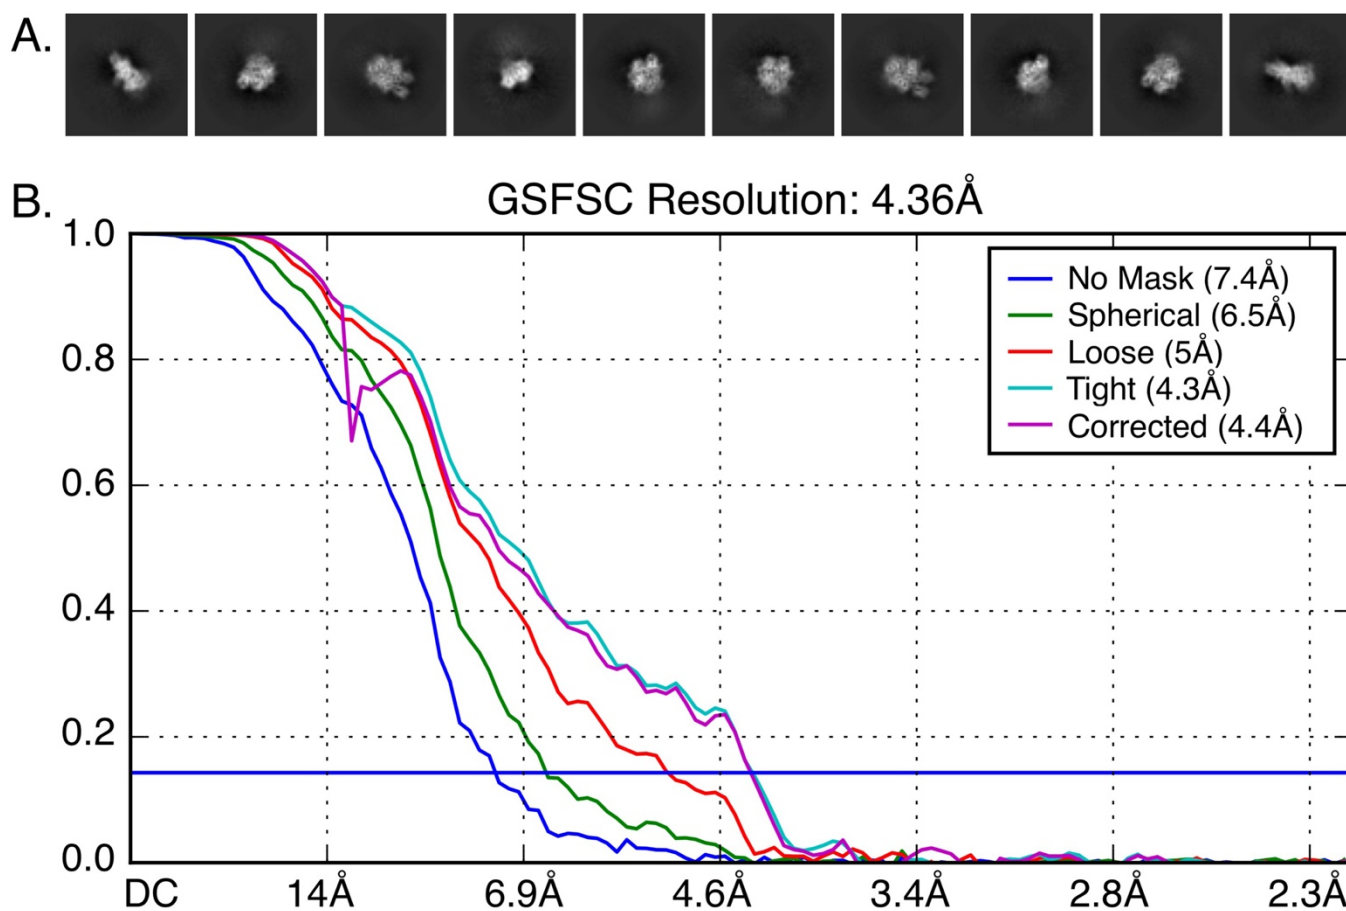

**Supplementary Figure 3A-B.** Data quality of the cryo-EM structure of fVa shown as (A) representative 2D class averages and (B) Gold standard Fourier Shell Correlation (GSFSC) of masked refinement of Factor Va map at 4.36 Å resolution (emd id: 23067).
